# Supplementary material for: Expression of IRAK1 in Hepatocellular Carcinoma, Its Clinical Significance, and Docking Characteristics with Selected Natural Compounds
Source: MDPI journal article supplement (doi:10.3390/curroncol29110700), 2022-11-18
Supplement: s1 [file s1]

## **Supplementary Materials**

### **Expression of IRAK1 in hepatocellular carcinoma, its clinical significance, and docking characteristics with selected natural compounds**

Chaoying Song, Xinyu Gu and Ruifang Li\*

Department of Pharmaceutical Sciences, School of Basic Medical Sciences,  
Henan University of Science and Technology, 471023, Luoyang, China

\* Correspondence: ylliruifang@163.com; Tel: + 86 150 9019 5676

## Table legends

**Scheme S1.** The entire in silico screening procedure of the molecular docking analysis.

**Figure S1.** Docking poses of schisandrin and gentiopicoside which failed the molecular docking for they were unable to be docked into the inhibitory pocket.

**Table S1.** Chemical information and drug likeness screening of the 14 representative natural compounds with anti-inflammatory and anti-tumor activities.

**Table S2.** Molecular docking results of the selected natural compounds after drug likeness screening and the original co-crystallized inhibitor with IRAK1.

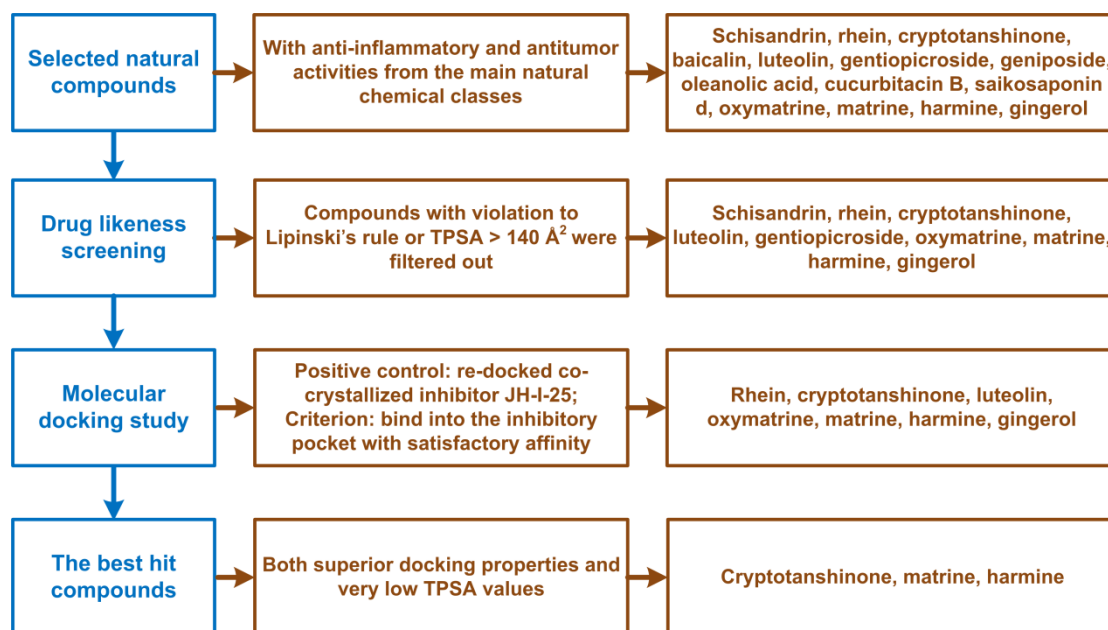

**Scheme S1.** The entire in silico screening procedure of the molecular docking analysis.

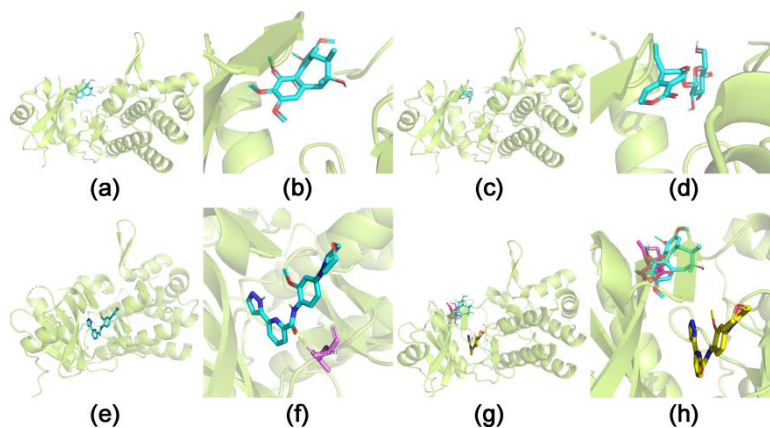

**Figure S1.** Docking poses of schisandrin and gentiopicroside which failed the molecular docking for they were unable to be docked into the inhibitory pocket. **(a, b)** Schisandrin; **(c, d)** Gentiopicroside; **(e, f)** The re-docked original ligand inhibitor, JH-I-25; **(g, h)** Superposed poses. Colors of the carbon skeleton: schisandrin in cyan, gentiopicroside in violet, JH-I-25 in yellow. Colors of other atoms: hydrogen (polar) in gray, nitrogen in blue, oxygen in red; The panels (a, c, e, g) are in global view, whereas panels (b, d, f, h) are in part view.

**Table S1.** Chemical information and drug likeness screening of the 14 representative natural compounds with anti-inflammatory and anti-tumor activities.

| Category           | Name             | Chemical structure                                                                  | Molecular formula                               | CAS NO.    | PubChem CID | Biological activities                                                   | MW    | Mlog <i>P</i> | H-A | H-D | Lipinski violations | TPSA, Å <sup>2</sup> |       |
|--------------------|------------------|-------------------------------------------------------------------------------------|-------------------------------------------------|------------|-------------|-------------------------------------------------------------------------|-------|---------------|-----|-----|---------------------|----------------------|-------|
| Lignans            | Schisandrin      | 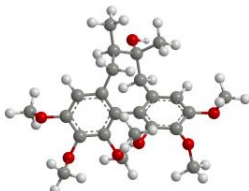   | C <sub>24</sub> H <sub>32</sub> O <sub>7</sub>  | 7432-28-2  | 23915       | anti-inflammatory<br>protect against liver injury<br>anti-cancer        | 432.5 | 1.77          | 7   | 1   | 0                   | 75.6                 |       |
| Anthraquinones     | Rhein            |    | C <sub>15</sub> H <sub>8</sub> O <sub>6</sub>   | 478-43-3   | 10168       | hepatoprotective<br>anti-cancer<br>anti-inflammatory                    | 284.2 | 0.29          | 6   | 3   | 0                   | 111.9                |       |
| Phenanthraquinones | Cryptotanshinone |    | C <sub>19</sub> H <sub>20</sub> O <sub>3</sub>  | 35825-57-1 | 160254      | anti-tumor<br>anti-inflammatory                                         | 296.4 | 2.36          | 3   | 0   | 0                   | 43.4                 |       |
| Flavones           | Baicalin         |   | C <sub>21</sub> H <sub>18</sub> O <sub>11</sub> | 21967-41-9 | 64982       | anti-inflammatory<br>antineoplastic<br>anticoronaviral<br>antibacterial | 446.4 | -1.63         | 11  | 6   | 2                   | H-A > 10,<br>H-D > 5 | 183.0 |
| Flavones           | Luteolin         |  | C <sub>15</sub> H <sub>10</sub> O <sub>6</sub>  | 491-70-3   | 5280445     | anti-inflammatory<br>immune system modulatory<br>antineoplastic         | 286.2 | -0.03         | 6   | 4   | 0                   | 107.0                |       |

|                    |                 |                                                                                     |                                                               |            |         |                                                                     |       |       |    |   |   |                                               |
|--------------------|-----------------|-------------------------------------------------------------------------------------|---------------------------------------------------------------|------------|---------|---------------------------------------------------------------------|-------|-------|----|---|---|-----------------------------------------------|
| Iridoid glycosides | Gentiopicroside | 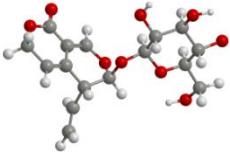   | C <sub>16</sub> H <sub>20</sub> O <sub>9</sub>                | 20831-76-9 | 88708   | hepatoprotective<br>anti-inflammatory                               | 356.3 | -1.42 | 9  | 4 | 0 | 134.9                                         |
| Iridoid glycosides | Geniposide      |    | C <sub>17</sub> H <sub>24</sub> O <sub>10</sub>               | 24512-63-8 | 107848  | anti-inflammatory<br>antioxidative<br>antiproliferative             | 388.4 | -1.86 | 10 | 5 | 0 | 155.1                                         |
| Triterpenoids      | Oleanolic acid  |    | C <sub>30</sub> H <sub>48</sub> O <sub>3</sub>                | 508-02-1   | 10494   | antitumor<br>hepatoprotective<br>protect against<br>liver injury    | 456.7 | 5.82  | 3  | 2 | 1 | 57.5<br>MlogP ><br>4.15                       |
| Triterpenoids      | Cucurbitacin B  |    | C <sub>32</sub> H <sub>46</sub> O <sub>8</sub>                | 6199-67-3  | 5281316 | antitumor<br>inhibit<br>proliferation<br>anti-inflammatory          | 558.7 | 1.76  | 8  | 3 | 1 | 138.2<br>MW > 500                             |
| Triterpenoids      | Saikosaponin d  |   | C <sub>42</sub> H <sub>68</sub> O <sub>13</sub>               | 20874-52-6 | 107793  | antitumor<br>anti-inflammatory                                      | 781.0 | 0.18  | 13 | 8 | 3 | 208.0<br>MW ><br>500,<br>H-A > 10,<br>H-D > 5 |
| Alkaloids          | Oxymatrine      |  | C <sub>15</sub> H <sub>24</sub> N <sub>2</sub> O <sub>2</sub> | 16837-52-8 | 114850  | anti-cancer<br>anti-inflammation<br>protect against<br>liver injury | 264.4 | 0.39  | 2  | 0 | 0 | 38.4                                          |

|           |          |                                                                                   |                                                  |            |         |                                                                  |       |      |   |   |   |      |
|-----------|----------|-----------------------------------------------------------------------------------|--------------------------------------------------|------------|---------|------------------------------------------------------------------|-------|------|---|---|---|------|
| Alkaloids | Matrine  | 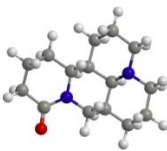 | C <sub>15</sub> H <sub>24</sub> N <sub>2</sub> O | 519-02-8   | 91466   | anti-inflammation<br>alleviate liver<br>injury<br>anti-cancer    | 248.4 | 2.27 | 2 | 0 | 0 | 23.6 |
| Alkaloids | Harmin   |  | C <sub>13</sub> H <sub>12</sub> N <sub>2</sub> O | 442-51-3   | 5280953 | anti-cancer<br>anti-inflammatory                                 | 212.3 | 1.56 | 2 | 1 | 0 | 37.9 |
| Phenols   | Gingerol |  | C <sub>17</sub> H <sub>26</sub> O <sub>4</sub>   | 23513-14-6 | 442793  | anti-inflammatory<br>anti-cancer<br>protective against<br>toxins | 294.4 | 2.14 | 4 | 2 | 0 | 66.8 |

Notes: MW, molecular weight; H-A, hydrogen bond acceptors; H-D, hydrogen bond donors; TPSA, topological polar surface area.

**Table S2.** Molecular docking results of the selected natural compounds after drug likeness screening and the original co-crystallized inhibitor with IRAK1.

| Compounds                         | Outcome of the docking                 | Binding energy (kcal/mol) | Residues of hydrogen bonding interactions |
|-----------------------------------|----------------------------------------|---------------------------|-------------------------------------------|
| Schisandrin                       | Unable to be docked to the active site | Not applicable            | Not applicable                            |
| Rhein                             | Docked to the active site successfully | -10.3                     | LEU-291, ILE-218, GLY-294                 |
| Cryptotanshinone                  | Docked to the active site successfully | -9.4                      | LEU-291                                   |
| Luteolin                          | Docked to the active site successfully | -10.1                     | LEU-291, ASP-358, LYS-239, ILE-218        |
| Gentiopicroside                   | Unable to be docked to the active site | Not applicable            | Not applicable                            |
| Oxymatrine                        | Docked to the active site successfully | -8.4                      | SER-344                                   |
| Matrine                           | Docked to the active site successfully | -9.3                      | None                                      |
| Harmine                           | Docked to the active site successfully | -9.2                      | LEU-291, ASP-358                          |
| Gingerol                          | Docked to the active site successfully | -7.6                      | LEU-291, ASP-358, LYS-239                 |
| Original ligand inhibitor JH-I-25 | Docked to the active site successfully | -10.2                     | LEU-291                                   |
